# Supplementary material
Source: publisher figshare collection journal article supplement (https://rs.figshare.com/ndownloader/files/14489045)
Supplement: Supplementary file [file 14489045]

# **The unified rule of phyllotaxis explaining both spiral and non-spiral arrangements**

## **Supplemental Materials**

Takuya Okabe<sup>1</sup>, Atsushi Ishida<sup>2</sup> and Jin Yoshimura<sup>3,4,5</sup>

<sup>1</sup>Graduate School of Integrated Science and Technology, Shizuoka University, 3-5-1  
Johoku, Hamamatsu 432-8561, Japan

<sup>2</sup>Center for Ecological Research, Kyoto University, Otsu, Shiga 520-2113, Japan.

<sup>3</sup>Graduate School of Science and Technology, and Department of Mathematical Systems  
Engineering, Shizuoka University, Hamamatsu 432-8561, Japan

<sup>4</sup> Department of Environmental and Forest Biology, State University of New York  
College of Environmental Science and Forestry, Syracuse, NY13210 USA.

<sup>5</sup> Marine Biosystems Research Center, Chiba University, Uchiura, Kamogawa, Chiba  
299-5502, Japan.

**Corresponding author:** Takuya Okabe (okabe.takuya@shizuoka.ac.jp)

### **Supplementary Text**

According to observations, the main sequence patterns of an elongated shoot ( $1/3$ ,  $2/5$ ,  $3/8$ , etc.) originate from the  $137.5^\circ$  arrangement at the shoot tip, depending on the vascular connections (fig. S1). The present model considers what longitudinal arrangements originate from a general angle different from  $137.5^\circ$ .

Three patterns for  $360\alpha=78.0$ ,  $99.5$ , and  $137.5$  degrees are shown in fig. S2a-c, where each arrow indicates the tendency to the nearest vertical arrangement. The first two angles

(78.0 and 99.5°) are of anomalous spiral phyllotaxis, which are rarely found in place of the 137.5° angle of normal spiral phyllotaxis. When  $\alpha$  is close to these angles, fitness  $f$  is given by

$$f_a = -w_2(\alpha - 1/2)^2 - w_3(\alpha - 1/3)^2 - w_4(\alpha - 1/4) - w_5(\alpha - 1/5)^2,$$

$$f_b = -w_2(\alpha - 1/2)^2 - w_3(\alpha - 1/3)^2 - w_4(\alpha - 1/4) - w_5(\alpha - 1/4)^2,$$

and

$$f_c = -w_2(\alpha - 1/2)^2 - w_3(\alpha - 1/3)^2 - w_4(\alpha - 2/5)^2 - w_5(\alpha - 2/5)^2,$$

respectively. Frequencies  $w_i$  ( $i=2\sim5$ ) are non-negative parameters satisfying  $w_2 + w_3 + w_4 + w_5 = 1$ . Since higher-order patterns are neglected for simplicity, no other case need be considered.

For  $w_2 = w_3 = w_4 = w_5 = 1/4$ , the three functions are plotted in fig. S2d. Fitness  $f$  for general values of  $\alpha$  and  $w_m$  is given by the maximum (most fitted) among the three cases,

$$f = \max[f_a, f_b, f_c].$$

To put it explicitly,  $f = f_a$  for  $0 < \alpha < 0.225$ ,  $f = f_b$  for  $0.225 < \alpha < 0.325$ , and  $f = f_c$  for  $0.325 < \alpha < 1/2$ . Two peaks in Fig. 2d-f are due to  $f_b$  and  $f_c$ . In general,  $f_c$  is larger than  $f_a$  and  $f_b$ , while  $f_b$  can be as large as  $f_c$  if  $w_2 = w_3 = 0$ ,  $w_4 + w_5 = 1$ .

The peak of  $f_c$  lies at

$$\alpha = w_2/2 + w_3/3 + 2(w_4 + w_5)/5,$$

where  $\partial f_c / \partial \alpha = 0$ . Thus, this optimal angle  $\alpha$  is an weighted average of Schimper-Braun fractions 1/2, 1/3 and 2/5, which occur with relative frequencies  $w_2$ ,  $w_3$ , and  $w_4 + w_5$ ,

respectively.

In principle, it is possible to evaluate the parameters  $w_i$  from the frequencies of occurrence of various patterns. In practice, however, no data has been published except in the original work of Bonnet [1]. Figure S3 shows irregular variations of the cycle 5 of a 2/5 phyllotaxis observed on branches of various plants. According to the top of the fourth column, three 3-cycles and six 5-cycles were observed on a peach tree, indicating that 1/3 and 2/5 occur with a relative frequency of three 3's to six 5's, or  $w_3:w_4+w_5=9:30$ . Therefore,  $w_3=3/130.23$  and  $w_4=w_5=5/130.39$ . These are used as representative values in Fig. 2f and Fig. 3d of the main text. The present model is so skeletal that high accuracy is not claimed for the  $137.5^\circ$  angle value. If the model is properly generalized to take account of higher-order patterns (like 3/8 and 5/13), optimal angle approaches to the ideal value  $137.5^\circ$  [2].

To visualize evolutionary trajectories, a further parameter has to be introduced. In terms of the ratio  $c$  of evolutionary rates of  $\alpha$  and  $w_2$ ,  $(\alpha, w_2)$  evolves in the direction of  $(\partial f/\partial \alpha, c \partial f/\partial w_2)$ . In Fig. 3b,  $c=10$ .

1. Bonnet, C. 1754 *Recherches sur l'usage des feuilles dans les plantes*. Elie Luzac, fils.
2. Okabe, T. 2015 Biophysical optimality of the golden angle in phyllotaxis. *Scientific Reports* **5**, 15358.

### Supplementary Figures S1-3

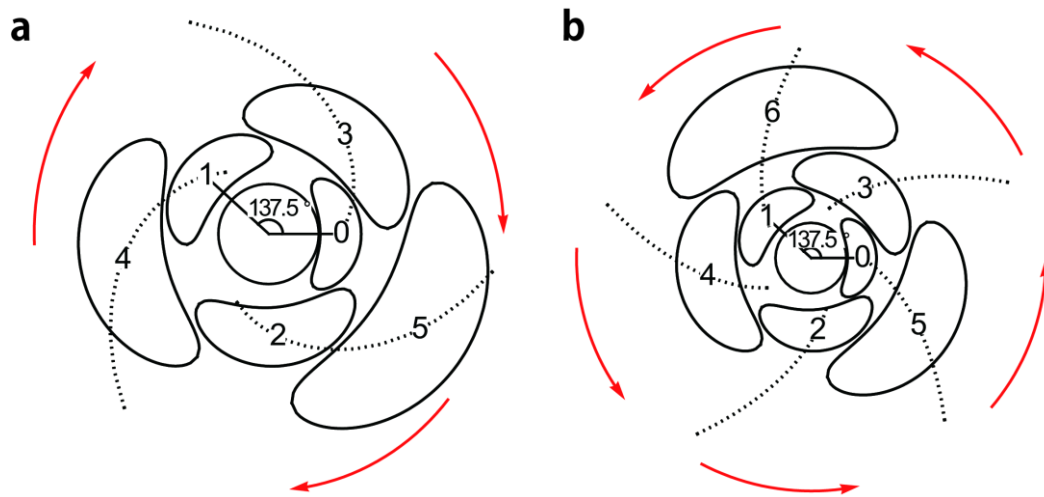

Figure S1: The  $137.5^\circ$  arrangement at the shoot tip gives rise to (a)  $1/3$  and (b)  $2/5$  phyllotaxis as the vascular bundles (dotted curves) are strengthened whereby the stem is twisted (arrows).

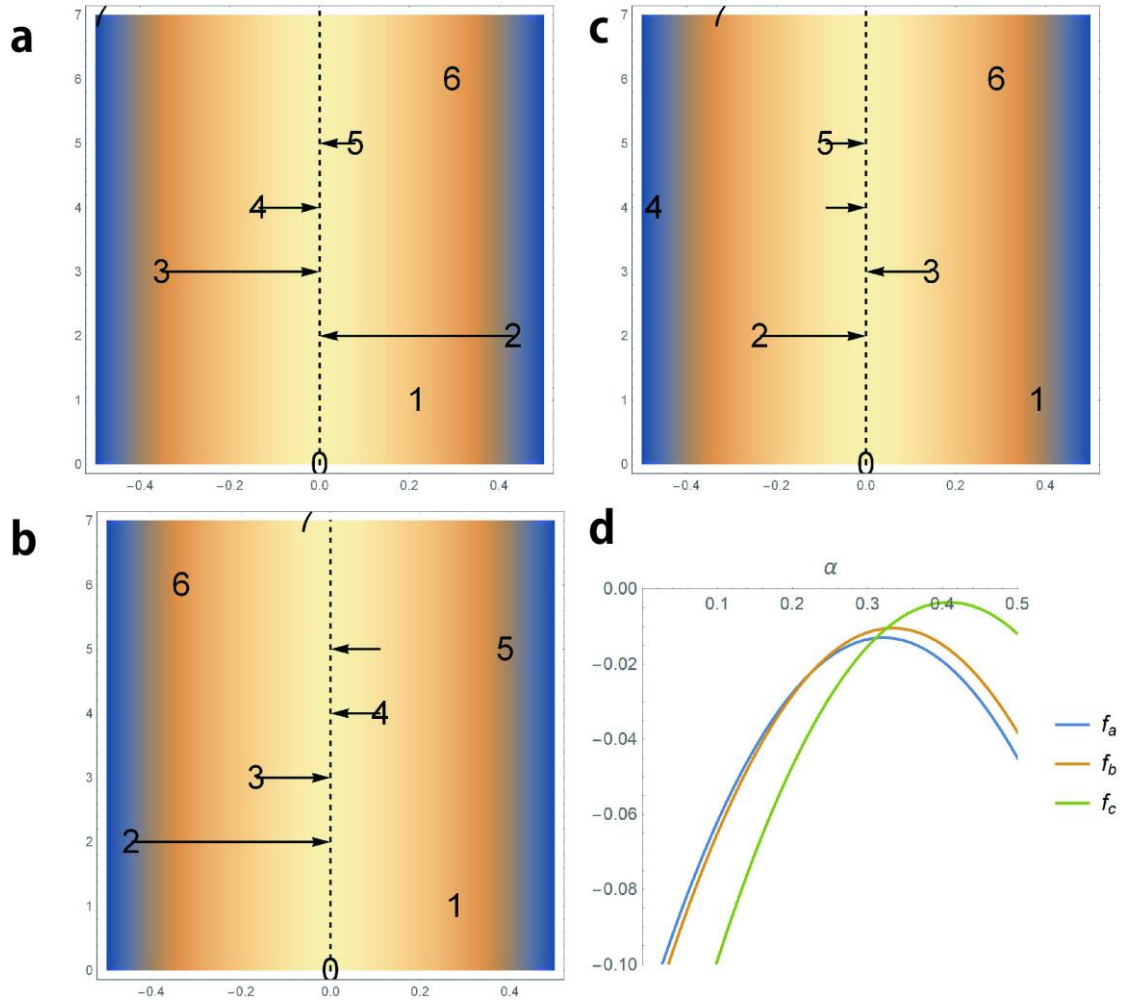

Figure S2: An arrow indicates tendency of leaves to a longitudinal arrangement (a)  $360\alpha=78.0$  ( $\alpha=0.216$ ). (b)  $360\alpha=99.5$  ( $\alpha=0.276$ ). (c)  $360\alpha=137.5$  ( $\alpha=0.382$ ). (d)  $f_a, f_b$  and  $f_c$  as a function of  $\alpha$  for  $w_2=w_3=w_4=w_5=1/4$ .

| Poirier.                              | Prunier.                 | Abricotier.                          | Pescher.                             | Peuplier.                             | Cerisier.                | Figuier.                 | Grofeiller.              |
|---------------------------------------|--------------------------|--------------------------------------|--------------------------------------|---------------------------------------|--------------------------|--------------------------|--------------------------|
| Branche<br>de<br>3 piés $\frac{1}{2}$ | Branche<br>de<br>3 piés. | Branche<br>de<br>4 piés.             | Branche<br>de<br>3 piés.             | Branche<br>de<br>1 pié $\frac{1}{2}$  | Branche<br>de<br>2 piés. | Branche<br>de<br>2 piés. | Branche<br>de<br>2 piés. |
| 5.                                    | 5.                       | 5.                                   | 5.                                   | 5.                                    | 5.                       | 5.                       | 5.                       |
| 5.                                    | 5.                       | 5.                                   | 5.                                   | 5.                                    | 5.                       | 5.                       | 5.                       |
| 5.                                    | 5.                       | 8.                                   | 5.                                   | 5.                                    | 5.                       |                          | 5.                       |
| 5.                                    | 5.                       | 5.                                   | 5.                                   | 5.                                    |                          |                          |                          |
| 5.                                    | 5.                       | 8.                                   | 3.                                   | 5.                                    |                          |                          |                          |
|                                       | 5.                       | 8.                                   | 3.                                   |                                       |                          |                          |                          |
|                                       | 5.                       | 8.                                   | 3.                                   |                                       |                          |                          |                          |
|                                       | 5.                       | 8.                                   |                                      |                                       |                          |                          |                          |
|                                       |                          |                                      |                                      |                                       |                          |                          |                          |
|                                       |                          | Pommier.                             | Meurier.                             | Tremble.                              | Framboisier              |                          |                          |
|                                       |                          | Branche<br>de<br>1 pié.<br>9 pouces. | Branche<br>de<br>3 piés<br>4 pouces. | Branche<br>de<br>3 piés<br>10 pouces. | Branche<br>de<br>3 piés. |                          |                          |
|                                       |                          | 5.                                   | 2.                                   | 5.                                    | 5.                       |                          |                          |
|                                       |                          | 3.                                   | 7.                                   | 5.                                    | 5.                       |                          |                          |
|                                       |                          | 5.                                   | 5.                                   | 5.                                    |                          |                          |                          |
|                                       |                          | 5.                                   | 5.                                   |                                       |                          |                          |                          |

Figure S3: Irregular variations of the cycle 5 of a  $2/5$  phyllotaxis on individual branches of various plants [1] (not in copyright).
